# Supplementary material
Source: publisher figshare collection journal article supplement (https://sage.figshare.com/ndownloader/files/21891456)
Supplement: Supplementary file 1 [file 21891456]

## Sheet: master sheet
			BRENT																					COURTNEY																				FASHION
ARTIST	Video	LINK	VC	Str	SSVC	Ac.G	Dist	Over	Clean	Solo	Strat	Tele	LP	SG	H.Bod	D.Mach	Fade	Scr.	Keys	Marsh	332	Orch	T.miss	Color	Light	Alt	Mono	Dim	Pal?	2char	Cart	Digi	Spd	Reflx	ExNo	Long	DTRK	Zoom	Multi	Shak	Super	Mirr	8mm	Make	Cross	TopL	Bowl	Spiky	Bald
Urban Dance Squad	Deeper Shade of Soul	https://www.youtube.com/watch?v=K4Dw6q-5iaA	1						1				1				1					1	1	1					*Neon				1							1						1			1
King's X	It’s Love	https://www.youtube.com/watch?v=ty_HqrY_k7I	1				1	1		1	1												1										1					1										1
U2	Night and Day	https://www.youtube.com/watch?v=DgRD676EIVI		1				1		1					1	1			1		1		1				1	1	*black							1					1					1
Charlatans U.K.	The Only One I Know	https://www.youtube.com/watch?v=0RJwW77Lsj8	1					1		1					1				1					1			1	1	*washed out, blue/yellow				1	1					1	1							1
Neneh Cherry	I've Got You Under My Skin	https://www.youtube.com/watch?v=29J2B2FIgt0	1		1											1			1						1	1	1	1	*Y/B												1								1
Jane’s Addiction	Been Caught Stealing	https://www.youtube.com/watch?v=jrwjiO1MCVs	1					1		1																	1								1									1	1	1		1	1
Cure, The	Close to Me	https://www.youtube.com/watch?v=IKvXusoS6ww		1												1			1			1	1		1	1		1																1				1
D.N.A. ft. Suzanne Vega	Tom’s Diner	https://www.youtube.com/watch?v=FLP6QluMlrg	1		1											1	1		1			1	1	1	1	1	1	1	*B/O				1								1
Replacements, The	Merry Go Round	https://www.youtube.com/watch?v=uac_KQn9Q-M	1										1				1							1	1		1					1	1															1
Cure, The	Never Enough	https://vimeo.com/27804205	1				1			1					1											1	1	1							1					1	1			1	1			1
Soup Dragons	I’m Free	https://www.youtube.com/watch?v=38j7p5WWNV0	1					1								1	1					1		1	1	1						1	1					1			1						1
Jane’s Addiction	Stop	https://www.youtube.com/watch?v=ZwI02OHtZTg	1				1			1										1					1	1							1		1					1	1					1		1
Iggy Pop	Candy	https://www.youtube.com/watch?v=6bLOjmY--TA	1					1									1				1		1	1	1		1													1						1
Gene Loves Jezebel	Jealous	https://www.youtube.com/watch?v=sUSOlhhE_1Y	1		1		1		1	1			1											1	1			1					1				1	1			1			1
Sonic Youth	Kool Thing	https://www.youtube.com/watch?v=SDTSUwIZdMk	1				1			1														1	1		1											1		1						1	1
Aztec Camera	The Crying Scene	https://www.youtube.com/watch?v=9aQXcT71cw4	1					1	1	1					1								1	1	1	1	1						1	1		1	1	1		1						1			1
Midnight Oil	King of the Mountain	https://www.youtube.com/watch?v=OuC_k51NUqU	1					1			1				1												1								1			1		1	1								1
Concrete Blonde	Joey	https://www.youtube.com/watch?v=OdpTcvSn8HQ	1			1		1		1	1												1		1		1	1									1
Adriean Belew	Pretty Pink Rose	https://www.youtube.com/watch?v=wDWPyVCT0X4	1			1		1		1	1				1		1								1			1									1			1
Midnight Oil	Forgotten Years	https://www.youtube.com/watch?v=X9eap_cKLP4	1			1		1		1				1	1								1				1						1				1		1		1		1				1	1	1
The Sundays	Here’s Where the Story Ends	https://www.youtube.com/watch?v=FHsip5xOenQ	1			1																			1		1	1	*B/Y				1				1			1	1		1
World Party	Way Down Now	https://www.youtube.com/watch?v=ZZrIdbumFiI	1					1	1	1	1						1						1		1	1						1	1					1		1							1
Lightning Seeds, The	Pure	https://www.youtube.com/watch?v=6myNbk15sMs	1			1		1		1					1				1				1									1	1					1			1						1
House of Love	I Don’t Know Why I Love You	https://www.youtube.com/watch?v=DVdfi1VoM7w	1			1		1	1						1								1		1			1	*B/Y								1										1	1
Cure, The	Pictures of You (list said “Pure”)	https://www.youtube.com/watch?v=X8UR2TFUp8w	1					1	1	1					1																			1	1			1		1	1		1	1				1
Depeche Mode	Enjoy the Silence	https://www.youtube.com/watch?v=m0AKJMGxwpE		1					1							1			1					1			1											1										1
Mission U.K., The	Deliverance	https://www.youtube.com/watch?v=6NUArfACdmQ	1				1	1		1															1		1	1												1	1
Blue Nile, The	The Downtown Lights	https://www.youtube.com/watch?v=8GVMnDjFKHw	1																1					1	1			1									1	1			1
Church, The	Metropolis	https://www.youtube.com/watch?v=K9wm7eKzti8 um my copy ends with some clips from Blade Runner?	1			1		1	1																			1				1	1				1	1			1
Sinead O’Connor	Nothing Compares 2 U	https://www.youtube.com/watch?v=auUPqxI1vqg	1							1							1		1			1											1					1		1	1
Peter Murphy	Cuts You Up	https://www.youtube.com/watch?v=bpz2AWu4PZg	1			1		1														1	1		1			1					1			1	1			1				1		1
Jesus Mary Chain, The	Head On	https://www.youtube.com/watch?v=eGp47YwDZ48	1				1	1		1					1		1							1	1		1						1					1	1	1	1
Psychedelic Furs	House	https://www.youtube.com/watch?v=xZjTwh-WGBo	1			1		1	1								1								1	1	1	1	*Sepia				1				1	1		1	1
Kate Bush	Love and Anger	https://www.youtube.com/watch?v=82G6UxbLH0Q	1		1			1		1									1	1					1			1									1				1
Depeche Mode	Personal Jesus	https://www.youtube.com/watch?v=u1xrNaTO1bI	1					1	1						1	1			1				1	1	1		1											1		1			1			1
Smithereens, The	A Girl Like You	https://www.youtube.com/watch?v=5LwjD8z2mOg	1					1		1					1					1							1	1						1	1	1	1	1		1
Rembrants, The	That’s Just the Way	https://www.youtube.com/watch?v=jmjQVoHrXe0	1						1	1		1												1													1	1		1	1							1
Jellyfish	That is Why	https://www.youtube.com/watch?v=qQTj_2mMfSA	1					1		1														1	1								1					1
Jesus Jones	Right Here, Right Now	https://www.youtube.com/watch?v=ooXN8mFLM74	1					1	1			1	1									1		1	1		1	1										1		1			1
Bingo Boys	How to Dance	https://www.youtube.com/watch?v=lX9RVMC1c3o	1		1											1			1			1		1	1		1	1					1					1		1			1
The Divinals	I Touch Myself	https://www.youtube.com/watch?v=wv-34w8kGPM	1					1		1			1											1	1		1	1									1	1					1
Living Colour	Love Rears its Ugly Head	https://www.youtube.com/watch?v=MQcPB1WkISI	1				1	1		1					1							1		1			1	1	*Blue						1		1				1					1
Enigma	Sad(e?)ness, Part 1	https://www.youtube.com/watch?v=4F9DxYhqmKw		1				1								1	1		1								1		*Sepai/earth tone			1					1				1
Happy Mondays	Step On	https://www.youtube.com/watch?v=2CQLAhNlbfQ	1					1													1												1					1		1
Jellyfish	Baby’s Coming Back	https://www.youtube.com/watch?v=R5IMmgxtCYM	1			1			1						1								1						*Neon		1						1	1		1
Lenny Kravitz	Always on the Run	https://www.youtube.com/watch?v=em8JuUW-OOE	1					1		1			1							1		1			1		1	1									1									1			1
Monie Love	It's a Shame	https://www.youtube.com/watch?v=KSU73awbZUw	1		1				1							1			1			1		1	1		1										1
EMF	Unbelievable	https://vimeo.com/78548198		1				1		1			1			1									1			1					1					1								1
Thunder	Dirty Love	https://www.youtube.com/watch?v=xlW2qhMn6Wo	1					1					1												1										1			1											1
La Tour	People are Still Having Sex	https://www.youtube.com/watch?v=0ImRyPymRAM		1						1						1			1					1	1	1			*Neon			1	1							1	1	1			1	1
Definition of Sound	Now is Tomorrow	https://www.youtube.com/watch?v=igFDUYmL3k0	1		1		1									1			1				1	1	1	1	1		*neaon/sepia				1		1			1			1								1
Alice in Chains	Man in the Box	https://www.youtube.com/watch?v=TAqZb52sgpU	1				1			1														1	1		1						1				1			1	1		1
Simple Minds	See the Lights	https://www.youtube.com/watch?v=MmKTMAak710	1		1			1	1	1					1					1							1		*B/W				1					1		1	1
The KLF	3 am Eternal	https://www.youtube.com/watch?v=LXEOESuiYcA	1		1										1	1			1	1			1		1			1							1	1	1				1
Elvis Costello	The Other Side of Summer	https://www.youtube.com/watch?v=Ww0hN-puTdA	1					1		1					1				1														1				1			1	1			1		1
Daddy Freddy	Daddy Freddy’s in Town	<https://www.youtube.com/watch?v=GvefYIn36lg>	1		1			1			1												1	1	1	1		1					1		1		1	1		1
Crystal Waters	Gypsy Woman	https://www.youtube.com/watch?v=_KztNIg4cvE	1		1														1							1			*Primary				1					1		1	1
3rd Bass	Pop Goes the Weasel	https://www.youtube.com/watch?v=HzXI_ApY4dY	1		1			1	1							1	1								1			1							1		1			1					1			1
The Farm	Groovy Train	https://www.youtube.com/watch?v=TsSPQzPyAk4	1					1	1	1	1				1	1	1			1						1							1				1	1	1	1	1								1
The La’s	There She Goes	https://www.youtube.com/watch?v=Ht0GxBFUvNo		1		1			1	1					1					1																											1
Seal	Crazy	https://www.youtube.com/watch?v=OWmaoQWX6Ws	1					1								1	1		1										*White/Black/red			1	1				1	1
Siouxsee/Banshees	Kiss them for Me	https://www.youtube.com/watch?v=ySGSb3pCUEM	1		1											1	1		1					1	1	1			*Desaturated				1					1			1
Drivin’ N Cryin’	Build a Fire	https://www.youtube.com/watch?v=INXSTzGavec	1					1		1			1							1				1	1		1						1				1	1		1	1
Toni Childs	I’ve Got to Go Now	https://www.youtube.com/watch?v=zYgsVbN96_k	1			1		1	1								1				1			1	1	1		1	*Warm (red/yellow/pink)				1				1				1					1
Jesus Jones	Real, Real, Real	https://www.youtube.com/watch?v=-BETKnn7Dxw	1					1					1			1							1	1	1	1			*Neon				1					1		1	1	1						1
White Trash	Apple Pie	https://www.youtube.com/watch?v=l-Wi4o0Q4BQ	1				1			1												1					1								1		1	1		1								1
EMF	Lies	https://www.youtube.com/watch?v=iIdg16PAK-c	1					1													1	1			1	1	1	1					1				1	1								1
NIN	Head Like a Hole	https://www.youtube.com/watch?v=ao-Sahfy7Hg	1				1									1		1							1	1	1	1				1	1							1	1	1	1			1		1
Big Audio Dynamite II	Rush	https://www.youtube.com/watch?v=-h8zs898lr4	1		1	1		1								1			1				1	1			1						1		1			1		1	1
RHCP	Give it Away	https://www.youtube.com/watch?v=Mr_uHJPUlO8	1		1			1		1	1																1		*B/W				1					1	1	1	1	1		1		1
PM Dawn	Set Adrift on Memory Bliss	https://www.youtube.com/watch?v=0AOVf9p9ht4	1		1				1							1	1		1										*Neon		1		1					1			1
Nirvana	Smells Like Teen Spirit	https://www.youtube.com/watch?v=hTWKbfoikeg	1				1	1		1	1							1							1			1	*Yellow				1				1									1	1		1
Julian Lennon	Saltwater	https://www.youtube.com/watch?v=ql1EnjVYrZM	1					1		1									1										*Neutral city/rich green-blue nature								1												1
Primal Scream	Movin on Up	https://www.youtube.com/watch?v=aKFYtUJFYVE	1			1		1		1			1		1		1				1		1		1		1										1	1		1							1
Live	Operation Spirit	https://www.youtube.com/watch?v=eza5-ladgYU	1					1			1														1		1	1					1					1		1						1
Soundgarden	Outshined	https://www.youtube.com/watch?v=sNh-iw7gsuI	1				1											1							1			1	*orange/charcoal				1					1		1						1
Ned’s Atomic Dustbin	Grey Cell Green	https://vimeo.com/134873440	1				1								1						1				1			1					1				1	1		1
Pearl Jam	Alive	https://www.youtube.com/watch?v=qM0zINtulhM	1		1		1	1		1	1		1							1					1		1		*B/W				1		1			1		1	1					1
PM Dawn	Paper Doll	https://www.youtube.com/watch?v=L51lTppnYe4	1													1	1		1					1	1				*oversaturated						1		1							1		1
RHCP	Under the Bridge	https://www.youtube.com/watch?v=GLvohMXgcBo	1					1	1															1		1							1				1		1	1	1	1	1			1
Matthew Sweet	Girlfriend	https://www.youtube.com/watch?v=n12OBlcHx9E	1				1	1		1																	1				1										1	1
Social Distortion	Bad Luck	https://www.youtube.com/watch?v=tQOJY4NXYzM	1		1		1			1			1												1		1	1									1	1		1	1		1	1				1
Seal	Killer	https://www.youtube.com/watch?v=7XBcT41ImSI		1												1			1						1	1	1	1				1	1				1	1	1	1
Teenage Fanclub	The Concept	https://www.youtube.com/watch?v=PAMqJP4VvdE	1				1	1		1	1						1			1						1		1					1		1		1	1			1
Arrested Development	Tennessee	https://www.youtube.com/watch?v=6VCdJyOAQYM	1		1											1			1								1		*B/W								1			1						1
Sugarcubes	Hit	https://www.youtube.com/watch?v=Z5fAWpv_axs	1					1	1													1		1	1			1					1				1	1		1				1				1
Live	Pain Lies on the Riverside	https://www.youtube.com/watch?v=UP5XavjhhQc	1			1		1			1										1				1		1						1					1		1							1
Cracker	Teen Angst	https://www.youtube.com/watch?v=42V8CqWw0xM	1			1		1																1					*oversaturated							1							1
King's X	Black Flag	https://www.youtube.com/watch?v=RR0G9XKuHdE	1				1			1														1	1	1	1	1				1	1				1			1				1		1	1	1	1
Pearl Jam	Even Flow	https://www.youtube.com/watch?v=CxKWTzr-k6s	1					1		1	1	1	1							1				1	1	1		1					1					1		1	1					1
Soundgarden	Rusty Cage	https://www.youtube.com/watch?v=pBZs_Py-1_0		1			1							1	1									1	1	1		1					1				1	1		1	1
Beastie Boys	Pass the Mic	https://www.youtube.com/watch?v=NpsvBvwRuf0		1												1			1					1			1						1				1	1		1	1		1					1
Midnight Oil	Sometimes (Live)	https://www.youtube.com/watch?v=TsV6vzygElE	1					1		1	1														1		1		*orange				1		1		1	1		1						1		1	1
XTC	Ballad of Peter Pumpkinhead	https://www.youtube.com/watch?v=pYupSHWEJxA	1					1	1						1									1	1		1	1					1	1			1	1		1
Beastie Boys	So Whatcha Want?	https://www.youtube.com/watch?v=ru3gH27Fn6E	1		1			1								1			1					1		1										1	1			1			1
Faith No More	Midlife Crisis	https://www.youtube.com/watch?v=U8b88US-6ts	1					1									1	1						1	1	1	1	1	*Red/blue				1				1			1	1					1
Shakespeares [sic] Sister	Stay	https://www.youtube.com/watch?v=_eXw47qb4U0	1													1	1		1					1	1			1	*purple/blue				1				1	1								1
Temple of the Dog	Hunger Strike	https://www.youtube.com/watch?v=VUb450Alpps		1				1			1		1															1					1				1				1
Alice in Chains	Would?	https://www.youtube.com/watch?v=Nco_kh8xJDs	1				1	1		1			1												1		1	1					1					1			1		1			1			1
Soup Dragons	Divine Thing	https://www.youtube.com/watch?v=M3TIncTTL4k	1					1					1				1			1				1	1	1		1					1		1		1	1		1	1	1	1				1
Morrissey	Tomorrow	https://www.youtube.com/watch?v=LRL03nT3Lj8	1					1		1																	1									1	1
Sonic Youth	1	https://www.youtube.com/watch?v=N3gN9Up6hmc	1				1			1																	1						1				1			1							1
Helmet	Unsung	https://www.youtube.com/watch?v=jBfygUiS50g	1				1			1			1												1		1	1					1				1	1					1					1
Mark Curry	Sorry about the Weather	https://www.youtube.com/watch?v=KQb8UN1KMfY	1			1				1													1		1									1	1	1		1		1			1
Faith No More	A Small Victory	https://www.youtube.com/watch?v=i9_hCjcFNO0	1				1			1							1				1			1	1			1					1		1		1	1		1	1					1
Alice in Chains	Them Bones	https://www.youtube.com/watch?v=zTuD8k3JvxQ	1				1			1	1														1			1					1					1			1
Soul Asylum	Somebody to Shove	https://www.youtube.com/watch?v=OrrE5bCA5lg	1				1	1		1		1	1							1	1				1	1	1	1					1				1							1		1
Utah Saints	Something good	https://www.youtube.com/watch?v=Z7MC8Lw5e9Q		1												1			1					1									1		1		1						1					1	1
10,000 Maniacs	These are the Days	https://www.youtube.com/watch?v=Z-HLxpWGCzc	1			1			1												1			1			1		Sepia								1				1
NIN	Wish	https://www.youtube.com/watch?v=kuoFiIFkdAA	1				1			1						1		1		1					1			1					1				1	1		1				1		1			1
Screaming Trees	Nearly Lost You	https://www.youtube.com/watch?v=PE5f561Y1x4	1					1		1														1		1	1						1				1			1	1		1
Jesus Jones	The Devil You know	https://www.youtube.com/watch?v=wewIoLusKP8	1					1	1				1			1					1			1	1		1						1				1	1		1	1		1	1	1	1		1	1
Digable Planets	Rebirth of Slick	https://www.youtube.com/watch?v=cM4kqL13jGM	1		1											1						1			1		1	1									1	1		1									1
Stone Temple Pilots	Sex Type Thing	https://www.youtube.com/watch?v=8hhu-OyHqZM	1				1	1					1											1	1	1	1	1					1							1	1					1
Lemonheads, The	Mrs. Robinson	https://www.youtube.com/watch?v=zvMFm5nKeUc	1					1					1				1																				1	1		1	1		1			1	1
Stereo MCs	Connected	https://www.youtube.com/watch?v=Z97JudYaNo8	1		1														1						1	1	1	1							1			1		1	1							1	1
Soul Asylum	Black Gold	https://www.youtube.com/watch?v=KpiFDrFEGvE	1			1		1	1			1	1							1				1	1			1					1		1		1	1		1	1
Belly	Feed the Tree	https://www.youtube.com/watch?v=LTtdtURXKqc	1			1		1	1	1					1		1							1	1	1	1						1				1	1	1	1	1						1
Neneh Cherry	Buddy X	https://www.youtube.com/watch?v=Y9MHz58La0U	1		1											1			1																1			1		1
Stone Temple Pilots	Plush	https://www.youtube.com/watch?v=V5UOC0C0x8Q	1				1								1									1	1	1		1					1					1						1				1
Tasmin Archer	Sleeping Satellite	https://www.youtube.com/watch?v=yGL2lcaRYqk	1			1		1		1							1				1		1		1			1									1	1
Porno for Pyros	Pets	https://www.youtube.com/watch?v=HE3OuHukrmQ	1		1			1	1	1														1			1	1	*B/W/undersaturated				1				1			1	1								1
Terrance Trent D’Arby	She Kissed Me	(this is the best I could find, wait until they watch the 2nd video): https://www.youtube.com/watch?v=mf1QKRm4tpk	1				1																		1			1									1	1	1
Soul Asylum	Runaway Train	https://www.youtube.com/watch?v=NRtvqT_wMeY	1			1											1									1	1	1					1		1		1	1		1	1					1			1
Radiohead	Creep	https://www.youtube.com/watch?v=XFkzRNyygfk	1				1		1			1			1										1			1									1	1									1
Blind Melon	No Rain	https://www.youtube.com/watch?v=3qVPNONdF58				1		1		1	1													1		1							1		1		1								1	1
Gin Blossoms	Hey Jealousy	https://www.youtube.com/watch?v=ah5gAkna3jI	1				1		1	1	1									1						1							1				1	1	1	1							1
Stereo MCs	Step it Up	https://www.youtube.com/watch?v=-ypcjgNU1z0	1		1											2			1						1	1							1					1	1	1			1					1	1
Cypress Hill	Insane in the Brain	https://www.youtube.com/watch?v=RijB8wnJCN0	1		1											1			1					1	1	1		1					1		1			1		1						1			1
Bjork	Human Behavior	https://www.youtube.com/watch?v=KDbPYoaAiyc	1		1			1		1						1			1					1	1			1					1		1		1	1		1	1
Urge Overkill	Sister Havana	https://www.youtube.com/watch?v=yzFlPdHt1Gk	1					1		1			1				1			1						1		1					1				1	1	1	1	1
Smashing Pumpkins	Today	https://www.youtube.com/watch?v=xmUZ6nCFNoU	1				1	1	1															1		1			*Candy-colored				1				1	1		1				1	1	1		1
White Zombie	Thunderkiss 65	https://www.youtube.com/watch?v=yPNFVj-pISU	1				1			1														1	1	1	1								1			1		1	1	1	1
Cranberries, The	Linger	https://www.youtube.com/watch?v=G6Kspj3OO0s	1			1			1	1												1			1	1	1	1					1				1	1		1	1
Lemonheads, The	Into Your Arms	https://www.youtube.com/watch?v=LWQfLmhrEYg	1			1		1		1				1												1											1	1		1	1
Breeders, The	Cannonball	https://www.youtube.com/watch?v=Qpoqzt2EHaA	1				1	1	1				1					1					1	1			1				1		1		1		1	1		1	1		1		1
Tony Bennett	Steppin’ Out With My Baby	https://www.youtube.com/watch?v=j2K27d5gRsY		1						1									1								1	1									1	1								1			1
US3	Cantaloop	https://www.youtube.com/watch?v=JwBjhBL9G6U		1					1	1						1	1		1			1				1	1	1					1				1	1	1							1			1
Danzig	Mother ‘93	https://www.youtube.com/watch?v=8Gw5pyjBYmQ	1					1		1										1					1			1				1	1		1			1			1					1			1
Deep Forest	Sweet Lullaby	https://www.youtube.com/watch?v=ATmBOnMJJkE		1												1			1		1												1				1			1	1					1
RATM	Freedom	https://www.youtube.com/watch?v=H_vQt_v8Jmw	1				1			1		1						1							1		1	1					1					1		1			1			1
Dig	Believe	https://www.youtube.com/watch?v=4nZRSc81-K0	1				1	1	1	1	1			1	1									1	1	1	1						1					1		1	1		1			1
Counting Crows	Mr. Jones	https://www.youtube.com/watch?v=-oqAU5VxFWs	1					1	1				1												1			1	*B/Y				1					1
Beck	Loser	https://www.youtube.com/watch?v=YgSPaXgAdzE	1		1	1																			1	1	1	1					1				1	1		1	1		1	1		1
Crash Test Dummies	Mmm…	https://www.youtube.com/watch?v=GaUqpnHvua8&list=RDGaUqpnHvua8#t=11	1			1											1		1					1				1	*Undersaturated						1		1											1	1
James	Laid	https://www.youtube.com/watch?v=g_qZ5B-yioU		1		1															1																1	1							1
Brand New Heavies	Dream On Dreamer	https://www.youtube.com/watch?v=FB8nIGKbpJY	1						1		1								1					1		1				1							1		1	1	1					1	1
Morrissey	The More You Ignore Me, The closer I get	https://vimeo.com/113668593	1			1		1	1																		1	1					1				1	1	1	1						1
Green Day	Longview	https://www.youtube.com/watch?v=FWvKSPQ9p5Q	1				1	1		1	1						1							1		1	1				1		1							1	1			1		1		1
Frente!	Bizarre Love Triangle	https://www.youtube.com/watch?v=IJ1c9ErCn7w	1		1	1															1			1				1	*B/R								1	1
Beastie Boys	Sabotage	https://www.youtube.com/watch?v=z5rRZdiu1UE		1			1	1		1																1							1				1	1	1	1			1				1
Lisa Loeb	Stay	https://www.youtube.com/watch?v=9Z_H11F7WDI	1			1			1																1											1	1	1
Offspring	Come Out and Play	https://www.youtube.com/watch?v=1jOk8dk-qaU	1				1	1			1															1		1					1					1		1	1		1
Live	Selling the Drama	https://www.youtube.com/watch?v=xSHAqHA-SPc	1			1		1	1	1														1	1	1	1	1					1				1		1	1						1
Green Day	Basket Case	https://www.youtube.com/watch?v=NUTGr5t3MoY	1				1	1			1													1	1		1		Neon								1				1							1
Mazzy Star	Fade Into You	https://www.youtube.com/watch?v=ImKY6TZEyrI	1			1			1	1		1					1							1	1	1		1	*B				1					1		1	1		1
Dinosaur Jr.	Feel the Pain	https://www.youtube.com/watch?v=JXkN3nJyWEA	1				1	1		1		1												1				1				1	1		1		1			1	1
Offspring	Self Esteem	https://www.youtube.com/watch?v=Abrn8aVQ76Q	1				1				1													1	1	1	1	1				1	1		1			1		1	1
Weezer	Undone Sweater Song	https://www.youtube.com/watch?v=LHQqqM5sr7g	1				1		1	1	1			1						1					1		1	1	Blue				1		1	1	1			1							1
Cranberries, The	Zombie	https://www.youtube.com/watch?v=6Ejga4kJUts	1				1	1	1	1			1		1									1	1		1						1				1			1			1					1
Hole	Doll Parts	https://www.youtube.com/watch?v=RD9xK9smth4	1		1		1		1									1						1	1	1	1		*Red/Yellow/White				1				1
Veruca Salt	Seether	https://www.youtube.com/watch?v=jC9AUR-iTo0	1				1						1	1						1				1		1	1	1					1				1	1	1	1			1
Urge Overkill	Girl You’ll be a Woman Soon	https://www.youtube.com/watch?v=1fr1iyhkyVs	1			1		1		1					1		1				1		1	1	1	1		1	red				1				1	1											1
Bush	Everything Zen	https://www.youtube.com/watch?v=Ps317u9Rhl0	1				1			1														1	1	1	1	1					1							1	1					1
Live	Lightning Crashes	https://www.youtube.com/watch?v=xsJ4O-nSveg	1					1	1												1			1	1	1		1	White/Yellow				1				1				1								1
Flaming Lips	She Don’t Use Jelly	https://www.youtube.com/watch?v=cvfxKbpoxRE	1			1	1	1	1						1									1	1	1	1	1				1			1		1		1	1			1				1
Oasis	Live Forever	https://www.youtube.com/watch?v=R2poqYvWsyU	1			1	1	1		1					1									1	1	1		1					1				1				1	1	1				1
Dionne Farris	I Know	https://www.youtube.com/watch?v=OT9h_-pGKK0	1			1		1	1		1					1	1						1
Rancid	Salvation	https://www.youtube.com/watch?v=Rvuae0Y-Spg	1				1	1		1					1					1					1		1								1		1			1	1							1
Jeff Buckley	The Last Goodbye	https://www.youtube.com/watch?v=3MMXjunSx80	1			1		1	1			1										1		1	1			1					1				1		1		1		1
Letters to Cleo	Here and Now	https://www.youtube.com/watch?v=ALHe12x_I0U	1				1	1					1		1									1	1	1		1						1			1	1		1	1						1
Sponge	Plowed	https://www.youtube.com/watch?v=MqKcUS2Npic	1				1	1			1							1							1		1	1	Yellow									1		1								1
Elastica	Connection	https://www.youtube.com/watch?v=ilKcXIFi-Rc	1				1	1			1	1												1							1		1	1					1									1
Bush	Little Things	https://www.youtube.com/watch?v=02K82uw4lio	1				1	1		1	1													1	1	1		1									1				1					1			1
Jill Sobule	I Kissed a Girl	https://www.youtube.com/watch?v=8FdwUGwasck	1			1		1	1	1					1									1	1					1			1				1	1	1						1	1
Radiohead	Fake Plastic Trees	https://www.youtube.com/watch?v=n5h0qHwNrHk	1			1	1	1							1							1		1	1	1			Primary								1		1									1	1
Better Than Ezra	Good	http://www.dailymotion.com/video/xktei1_good-better-than-ezra_music	1				1			1					1									1	1	1		1	Neon								1	1		1	1		1
Shudder to Think	X-French Tee Shirt	https://www.youtube.com/watch?v=0eLnhDzf6p8	1				1	1					1				1								1			1							1		1						1	1					1
spearhead	Hole in the Bucket	https://www.youtube.com/watch?v=DRfr4LAqi18	1		1				1							1								1	1		1	1					1				1	1		1						1			1
Filter	Hey Man Nice Shot	https://www.youtube.com/watch?v=o9mJ82x_l-E	1				1	1		1	1							1						1	1	1		1	Neon				1					1		1									1
White Zombie	More Human Than Human	https://www.youtube.com/watch?v=E0E0ynyIUsg	1				1			1														1	1	1	1	1			1		1		1		1	1		1			1
alanis Morissette	you oughta know	https://www.youtube.com/watch?v=9nUz34iQDuU	1				1	1	1		1									1				1	1	1							1				1	1		1	1
Sponge	Molly (16 candles down the drain)	https://www.youtube.com/watch?v=JSxNqSAvkDE	1					1	1	1					1								1	1	1			1									1	1			1			1
Better Than Ezra	In The Blood	https://www.youtube.com/watch?v=QIpNzHf3LDA	1				1	1	1	1			1												1	1	1													1			1
Silverchair	Tomorrow	https://www.youtube.com/watch?v=cENzSq1DzMQ	1			1	1	1	1	1														1	1			1					1				1	1				1		1
Civ	Cant Wait One Minute More	https://www.youtube.com/watch?v=ngZXgBH7v9c	1					1							1			1									1			1		1	1	1				1		1						1		1	1
D’Angelo	Brown Sugar	https://www.youtube.com/watch?v=H_WzjiTzZBA	1							1									1						1			1									1												1
Rancid	Time Bomb	https://www.youtube.com/watch?v=DhKHAopx7D0	1					1		1					1					1							1	1					1				1											1	1
Foo Fighters	I’ll Stick Around	https://www.youtube.com/watch?v=X_rTTsZZ9KE	1				1	1						1	1									1	1							1	1				1			1	1							1
Goo Goo Dolls	Name	https://www.youtube.com/watch?v=yQOBUrRaPU0	1			1				1															1		1	1									1									1		1
PUSA	Lump	https://www.youtube.com/watch?v=_sj_U6vObUA	1					1																1									1				1			1									1
Toadies	Possum Kingdom	https://www.youtube.com/watch?v=nkKxGzm98AU	1					1		1	1		1							1				1		1		1					1					1
Edwyn Collins	A Girl Like You	https://www.youtube.com/watch?v=nkKxGzm98AU		1				1	1	1							1								1	1	1	1				1						1	1
Garbage	Queer	https://www.youtube.com/watch?v=3ppiohVRZ0s	1					1	1										1				1		1		1	1				1	1		1		1			1	1				1	1			1
Rentals, The	Friends of P	https://www.youtube.com/watch?v=wi-H6ohY37k	1					1		1						2						1				1	1									1
Joan Osborne	One of Us	https://www.youtube.com/watch?v=nPFnHdJ0dl0	1					1		1														1	1		1						1		1		1	1		1			1			1		1	1
Folk Implosion	Natural One	https://www.youtube.com/watch?v=IYerwwTV5qc&list=RDIYerwwTV5qc	1					1	1						1									1			1	1										1									1
Oasis	Wonderwall	https://www.youtube.com/watch?v=6hzrDeceEKc	1			1			1						1							1		1	1	1	1						1				1	1	1		1		1	1			1
Everclear	Santa Monica	https://www.youtube.com/watch?v=MW6E_TNgCsY	1					1	1				1												1			1				1	1															1
PUSA	Peaches	https://www.youtube.com/watch?v=uV14jq2n-jg	1					1	1					1	1																		1		1	1	1			1									1
Goo Goo Dolls	Naked	https://www.youtube.com/watch?v=yWBuvaMvdt4	1					1	1	1														1	1	1		1					1				1		1	1									1
Radiohead	High and Dry	https://www.youtube.com/watch?v=7qFfFVSerQo	1			1		1	1	1	1	1															1							1			1	1		1								1
Dog’s Eye View	Everything Falls Apart	https://www.youtube.com/watch?v=Maz6jFdvn2Q	1			1		1		1					1									1									1				1	1	1					1	1				1
Foo Fighters	Big Me	https://www.youtube.com/watch?v=pLdJQFTnZfA	1						1					1						1					1								1				1								1		1	1
Garbage	Only Happy When it Rains	https://www.youtube.com/watch?v=GpBFOJ3R0M4	1				1	1	1	1		1			1		1							1	1								1							1				1
Spacehog	In the Meantime	https://www.youtube.com/watch?v=TDkhl-CgETg	1					1	1				1							1					1								1		1		1			1			1	1	1			1
Stabbing Westward	What Do I Have to Do?	https://www.youtube.com/watch?v=VNsVpL8TDLA	1				1			1													1	1	1	1							1				1			1	1	1							1
Marilyn Manson	Sweet Dreams	https://www.youtube.com/watch?v=QUvVdTlA23w		1			1	1		1								1						1	1	1							1				1			1				1	1	1			1
Tracy Bonham	Mother Mother	https://www.youtube.com/watch?v=2Xi8NvSetZc	1			1		1										1					1			1											1	1		1							1
RATM	Bulls on Parade	https://www.youtube.com/watch?v=3L4YrGaR8E4	1					1										1						1	1	1	1	1					1		1		1	1		1			1			1			1
Garbage	Stupid Girl	https://www.youtube.com/watch?v=2GhPUAVgHZc	1					1	1	1														1	1	1	1						1	1		1			1	1			1
Superdrag	Sucked Out	https://vimeo.com/100902043	1					1	1	1				1	1			1						1									1		1		1	1					1				1
Nada Surf	Popular	https://www.youtube.com/watch?v=RNc45FTenhg	1				1	1					1											1				1		1			1		1		1									1	1	1
Beck	Where it’s at	https://www.youtube.com/watch?v=EPfmNxKLDG4	1					1		1						1	1		1			1		1	1	1							1		1		1	1	1	1							1
311	Down	https://www.youtube.com/watch?v=lYBIRHi5-o8	1				1	1																1		1		1				1	1					1			1					1		1	1
Wallflowers, The	6th Avenue Heartache	https://www.youtube.com/watch?v=kXDiGtgPL6E	1			1		1	1	1	1	1		1			1			1						1	1						1				1	1	1	1	1		1
Eels	Novocaine for the Soul	https://www.youtube.com/watch?v=V2yy141q8HQ	1					1		1			1									1				1	1							1	1		1	1					1				1	1
Filter	Jurrassitol	https://www.youtube.com/watch?v=zFj3vXp3R_M	1				1				1						1							1	1		1	1	* Y/B			1	1				1				1					1		1	1
RATM	People of the Sun	https://www.youtube.com/watch?v=bCbZRa-Twv8	1				1	1																1		1	1	1			1		1	1	1			1	1	1			1			1			1
Sublime	What I Got	https://www.youtube.com/watch?v=0Uc3ZrmhDN4	1		1	1				1						1								1	1	1	1	1				1	1				1	1		1	1		1			1		1	1
Cake	The Distance	https://www.youtube.com/watch?v=F_HoMkkRHv8	1					1							1									1	1	1							1				1			1							1		1
Marilyn Manson	The Beautiful People	https://www.youtube.com/watch?v=Ypkv0HeUvTc	1				1											1						1	1	1	1	1					1					1		1				1		1			1
Fiona Apple	Shadowboxer	https://www.youtube.com/watch?v=QnXjISlKLuE	1					1		1		1					1		1			1			1		1	1						1				1		1	1
Ginsburg/McCartney/Glass	The Ballad of the Skeletons	https://www.youtube.com/watch?v=ZdvM0IB5Sbs		1				1	1	1																	1										1		1	1	1		1			1			1
Tool	Track #1 (“Stinkfist”)	https://www.youtube.com/watch?v=F3BKcd3NS_Q	1				1											1						1	1			1				1	1		1		1				1		1			1			1
Prodigy	Firestarter	https://www.youtube.com/watch?v=wmin5WkOuPw	1				1									1			1						1		1	1					1				1	1		1				1				1
Cardigans, The	Lovefool	https://www.youtube.com/watch?v=NI6aOFI7hms	1						1						1				1					1					*Primary				1					1
Chemical Brothers, The	Setting Sun	https://www.youtube.com/watch?v=p5NX1FC-7-w	1		1											1			1				1	1	1			1		1			1			1	1			1	1			1		1			1
Roots, The	What They Do	https://www.youtube.com/watch?v=_qzacv8dtb4	1		1				1	1														1			1		*sepia, blue				1	1		1	1			1									1
Space Monkeys	Sugar Cane	https://www.youtube.com/watch?v=tnsz-Ogji30	1					1	1							1							1		1								1				1	1		1		1
Sermon/Redman/Murray	Rapper’s Delight	https://www.youtube.com/watch?v=-PKhMe3e0uU		1					1							1	1		1					1	1	1		1					1		1		1				1								1
Cornershop	Brimful of Asha	https://www.youtube.com/watch?v=lM7H0ooV_o8	1		1			1	1		1				1		1					1	1				1						1				1	1			1
Radiohead	Karma Police	https://www.youtube.com/watch?v=1uYWYWPc9HU	1			1			1															1	1			1								1	1			1									1
Verve, The	Bittersweet Symphony	https://www.youtube.com/watch?v=1lyu1KKwC74	1		1			1	1								1					1			1											1	1			1									1
Busta Rhymes	Put Your Hands Where My Eyes Could See	https://www.youtube.com/watch?v=jxhigzl35sw	1													1	1		1				1	1	1	1		1					1				1							1		1			1
Forest for the Trees	Dream	https://www.youtube.com/watch?v=Hu-DjX7w7qA	1			1		1								1			1					1	1	1	1	1				1	1				1	1		1	1	1	1			1		1	1
Dandy Warhols, The	Not if You Were the Last Junkie on Earth	https://www.youtube.com/watch?v=APrpB-i4d_E	1					1		1				1																			1				1							1		1
Sarah McLachlan	Building a Mystery	https://www.youtube.com/watch?v=_QUq72fla3o	1			1		1	1	1														1	1	1		1										1			1
Missy Elliott	The Rain	https://www.youtube.com/watch?v=hHcyJPTTn9w	1		1											1	1		1					1	1	1		1					1				1			1	1
Sugar Ray	Fly	https://www.youtube.com/watch?v=cxHkD7rUm_Q&list=RDcxHkD7rUm_Q	1			1	1	1	1							2								1	1	1											1			1	1		1			1		1	1
Radiohead	Paranoid Android	https://www.youtube.com/watch?v=fHiGbolFFGw	1			1	1		1	1																1					1						1	1								1			1
REEF	Place your Hands	https://vimeo.com/86992008	1					1		1			1													1			*Orange/gray			1	1	1			1	1										1
Prodigy	Breathe	https://www.youtube.com/watch?v=6_PAHbqq-o4		1		1		1								1		1	1					1	1			1					1				1	1						1		1		1
Chemical Brothers, The	Block Rockin’ Beats	https://www.youtube.com/watch?v=iTxOKsyZ0Lw		1												1									1			1					1				1							1					1
Hanson	MMMBop	https://www.youtube.com/watch?v=NHozn0YXAeE	1					1					1				1				1												1				1	1		1	1		1
Blur	Song 2	https://www.youtube.com/watch?v=SSbBvKaM6sk	1			1	1	1		1										1			1		1			1					1					1
Squirrel Nut Zippers	Hell	https://www.youtube.com/watch?v=yS2IBMQIjDo		1		1				1					1			1	1			1		1	1			1	*Red					1	1		1	1			1		1	1				1
Fiona Apple	Sleep to Dream	https://www.youtube.com/watch?v=L9Wnh0V4HMM	1													1			1					1		1		1				1									1
Erykah Badu	On and On	https://www.youtube.com/watch?v=-CPCs7vVz6s	1		1											1			1			1						1							1	1	1
Verve Pipe, The	The Freshman	https://www.youtube.com/watch?v=1umEXpGHc0E	1					1	1		1										1			1	1			1									1	1			1						1	1
Veruca Salt	Volcano Girls	https://www.youtube.com/watch?v=qyVSKydUxKk	1					1		1				1										1	1	1	1	1					1					1		1
Rammstein	Du Hast	https://www.youtube.com/watch?v=W3q8Od5qJio	1				1									1			1					1	1			1					1				1	1		1	1								1
Eve 6	Inside Out	https://www.youtube.com/watch?v=T8Xb_7YDroQ	1				1	1				1									1				1	1		1										1		1								1
Semisonic	Closing Time	https://www.youtube.com/watch?v=xGytDsqkQY8	1					1		1			1							1				1				1	*Green							1	1		1										1
Fastball	The Way	https://www.youtube.com/watch?v=g0Xm0gwdoLg	1					1		1					1									1		1	1	1		1			1				1		1	1	1		1				1
Finely Quaye	Sunday Shining		1					1														1
Natalie Imbruglia	Torn	https://www.youtube.com/watch?v=VV1XWJN3nJo	1			1		1	1	1							1																1	1		1	1	1										1	1
Fatboy Slim	Going Out of my Head	https://www.youtube.com/watch?v=tmw94O9OWRE		1				1								1									1	1		1					1				1	1	1	1
Bob Dylan	Not Dark Yet	https://www.youtube.com/watch?v=RZgBhyU4IvQ	1						1		1	1													1	1	1	1	*Blue				1				1	1		1	1	1
Daft Punk	Around the World	https://www.youtube.com/watch?v=7exajMfNiFQ		1					1							1	1		1					1	1	1		1									1	1
Powerman 5000	Nobody’s Real	https://www.youtube.com/watch?v=gv_f-8pt9wE	1				1																		1	1		1				1	1					1		1							1	1
Stroke 9	Little Black Backpack	https://vimeo.com/66511482	1			1		1		1		1												1				1					1		1		1			1								1
Macy Gray	I Try	https://www.youtube.com/watch?v=WEQ0l_m3Xm0	1					1	1										1			1		1				1					1				1	1										1
Staind	Mudshovel	https://www.youtube.com/watch?v=FuAC9YIC2Bs	1				1																	1	1	1		1					1				1	1	1	1	1					1		1	1
Static-X	Push It	https://www.youtube.com/watch?v=Ps0MfBG5-Uo	1				1																	1	1			1			1						1	1		1								1
Kelis	Caught out There	https://www.youtube.com/watch?v=N3JFwd1bk4Q	1		1											1	1	1	1		1		1	1	1			1					1				1				1					1			1
Eve 6	Gotta Man	https://www.youtube.com/watch?v=NUEQ7BmGh9k	1		1											1	1		1					1		1							1				1			1	1		1						1
Hot Boys	We On Fire	https://www.youtube.com/watch?v=5yBoCcef6Lc	1													1			1									1					1				1	1		1						1
Bif Naked	Moment of Weakness	https://www.youtube.com/watch?v=UWuddKPLXSw	1				1							1				1															1		1	1	1											1
Jimmie’s Chicken Shack	Do Right	https://www.youtube.com/watch?v=8WR3gF9J0hQ	1					1	1														1	1									1		1		1	1		1			1		1			1	1
Christina Aguilera	Genie in a Bottle	https://www.youtube.com/watch?v=kIDWgqDBNXA	1					1								1			1						1			1					1				1											1
Macy Gray	Do Something	https://www.youtube.com/watch?v=z52sEQfoGys	1						1							1	1		1		1	1			1				*white			1	1				1									1			1
Freestylers	Here We Go	https://www.youtube.com/watch?v=_fopsRtC-M4	1		1																	1				1							1				1			1						1		1	1
Len	Steal my Sunshine	https://www.youtube.com/watch?v=E1fzJ_AYajA	1						1							1			1							1							1				1		1	1			1			1			1
Enrique Iglesias	Bailamos	https://www.youtube.com/watch?v=Pv0PAchVGCw	1			1				1						1								1	1			1					1																1
Jennifer Lopez	If You Had My Love	https://www.youtube.com/watch?v=lYfkl-HXfuU	1													1			1						1			1	*white			1	1					1	1										1
Buckcherry	Lit Up	https://www.youtube.com/watch?v=cABZfkRcQ6A	1					1		1			1												1			1					1						1	1		1	1			1		1	1
Robbie Williams	Millenium	https://www.youtube.com/watch?v=e-bIqEsRATQ	1													1						1			1					1			1	1			1	1			1	1
Kid Rock	Bawitdaba	https://www.youtube.com/watch?v=1OrNS2zbTZg	1				1				1							1						1	1			1				1	1				1	1	1	1	1	1				1		1	1
Godsmack	Whatever	https://www.youtube.com/watch?v=ME3Ahe8z16k	1				1						1											1		1	1						1					1		1	1		1	1		1		1	1
Baz Luhrman	Everybody’s Free Tow Wear	https://www.youtube.com/watch?v=sTJ7AzBIJoI		1					1							1			1							1	1						1					1	1	1	1		1				1
Ricky Martin	Livin’ La Vida Loca	https://www.youtube.com/watch?v=p47fEXGabaY	1			1		1														1			1	1		1				1	1		1		1	1			1							1
Lo Fidelity Allstars	Battleflag	https://www.youtube.com/watch?v=ZuwWvPGul3o	1					1		1						1			1					1	1			1					1				1	1			1					1	1
Fatboy Slim	Praise You	https://www.youtube.com/watch?v=ruAi4VBoBSM	1		1											1			1																1	1		1		1			1
Orgy	Blue Monday	https://www.youtube.com/watch?v=aJZTfl3DmCU	1				1			1						2								1	1	1	1	1				1	1				1	1					1	1				1
Eminem	My Name Is	https://www.youtube.com/watch?v=sNPnbI1arSE	1						1							1									1	1	1	1		1			1		1		1	1	1	1				1		1			1
Stardust	Music Sounds Better With You	https://www.youtube.com/watch?v=QTk_TULd_VY		1					1							1			1																											1
Limp Bizkit	Faith	https://www.youtube.com/watch?v=l-EdCNjumvI	1					1	1									1						1		1	1						1				1	1		1						1		1
			BRENT																					COURTNEY																				FASHION
			VC	Str	SSVC	Ac.G	Dist	Over	Clean	Solo	Strat	Tele	LP	SG	H.Bod	D.Mach	Fade	Scr.	Keys	Marsh	332	Orch	T.miss	Color	Light	Alt	Mono	Dim	Pal?	2char	Cart	Digi	Spd	Reflx	ExNo	Long	DTRK	Zoom	Multi	Shak	Super	Mirr	8mm	Make	Cross	TopL	Bowl	Spiky	Bald
			259	28	42	60	87	167	91	126	40	18	41	14	52	77	53	23	70	30	23	34	37	144	177	113	119	155	don’t do this one	8	10	33	193	19	60	23	190	168	42	165	123	17	65	38	16	90	38	73	81
			0.8993	0.0972	0.1458	0.2083	0.3021	0.5799	0.316	0.4375	0.1389	0.0625	0.1424	0.0486	0.1806	0.2674	0.184	0.0799	0.2431	0.1042	0.0799	0.1181	0.1285	0.5	0.6146	0.3924	0.4132	0.5382		0.0278	0.0347	0.1146	0.6701	0.066	0.2083	0.0799	0.6597	0.5833	0.1458	0.5729	0.4271	0.059	0.2257	0.131944	0.0555556	0.3125	0.131944	0.253472	0.28125
[truncated: 43 more columns]
